# Supplementary material
Source: ML conference proceedings conference paper supplement (https://www.ecva.net/papers/eccv_2020/papers_ECCV/html/123720528_ECCV_2020_paper.php)
Supplement: Supplementary file 1 [file 123720528-supp.zip]

## 6 Supplementary Materials

### 6.1 HQF Dataset Details

The details of the High Quality Frames dataset are shown in Table 6.

Table 6: Breakdown of the sequences included in HQF. To provide some inter-device variability, the dataset is taken with two separate DAVIS 240C cameras, 1 and 2.

| Sequence             | Length<br>[s] | Cam. | Frames<br>[k] | Events<br>[M] | Description                           |
|----------------------|---------------|------|---------------|---------------|---------------------------------------|
| bike_bay_hdr         | 99.0          | 1    | 2.4           | 19.8          | Camera moves from dim to bright       |
| boxes                | 24.2          | 1    | 0.5           | 10.1          | Indoor light, translations            |
| desk                 | 65.8          | 2    | 1.5           | 13.5          | Natural light, various motions        |
| desk_fast            | 32.0          | 2    | 0.7           | 12.6          | Natural light, fast motions           |
| desk_hand_only       | 20.6          | 2    | 0.5           | 0.8           | Indoor light, static camera           |
| desk_slow            | 63.3          | 2    | 1.4           | 1.9           | Natural light, slow motions           |
| engineering_posters  | 60.7          | 1    | 1.3           | 15.4          | Indoor light, text and images         |
| high_texture_plants  | 43.2          | 1    | 1.1           | 14.6          | Outdoors, high textures               |
| poster_pillar_1      | 41.8          | 1    | 1.0           | 7.1           | Outdoors, text and images             |
| poster_pillar_2      | 25.4          | 1    | 0.6           | 2.5           | Outdoors, text and images, long pause |
| reflective_materials | 28.9          | 1    | 0.6           | 7.8           | Natural light, reflective objects     |
| slow_and_fast_desk   | 75.6          | 1    | 1.7           | 15.0          | Natural light, diverse motion         |
| slow_hand            | 38.9          | 1    | 0.9           | 7.6           | Indoor, slow motion, static camera    |
| still_life           | 68.1          | 1    | 1.2           | 42.7          | Indoors, Indoor light, 6DOF motions   |

### 6.2 Voxel Generation

Two natural choices for generating voxel grids from the event stream are *fixed rate* and *fixed events* (Figure 5). In fixed rate, voxels are formed from  $t$  second wide slices of the event stream (variable event count), endowing the resulting inference with a fixed frame rate. This has the downside that inference cannot adapt to changing scene dynamics, a disadvantage shared by conventional cameras. A special case of fixed rate is *between frames* where all events between two image frames are used to form a voxel grid.

In fixed events, one waits for  $N$  events before making a voxel grid no matter how long it takes (variable duration). Fixed events has the downside that if the camera receives few events, either because the scene has little texture or the motion is slow, the inference rate can slow to a crawl. This method allows matching the value  $N$  to the average  $N$  of the training set during inference, potentially benefiting the network. The average events per voxel in our training set is 0.0564.

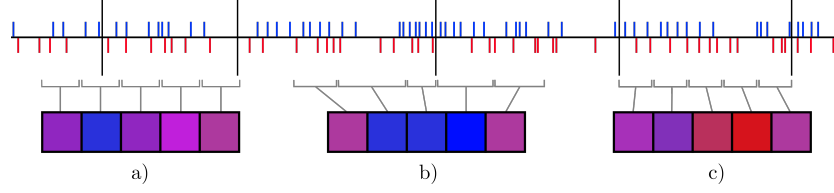

Fig. 5: Events (blue and red lines) on a timeline are discretized into voxels below (squares) according to: a) *fixed rate*, b) *fixed events*, c) *between frames* (frames denoted by black lines).

### 6.3 CTs extended

As outlined in Section 3, we propose several methods for estimating the CTs for a given event-based dataset. In total, we tried three different methods:

- Creating a simulator scene with similar texture and range of motions as the real sequence and adjusting the CTs until the  $\frac{\text{events}}{\text{pix}\cdot\text{s}}$  match.
- Simulating events from the APS frames (if they are available) and adjusting the CTs until the  $\frac{\text{events}}{\text{pix}\cdot\text{s}}$  match the real sequence.
- Creating a calibration scene in the simulator, recording this scene on-screen and adjusting the CT of the event camera to match the  $\frac{\text{events}}{\text{pix}\cdot\text{s}}$  of the simulation.

We describe the first two approaches in the main paper. These approaches indicate CTs of approximately 0.3 and 0.75 for IJRR and MVSEC respectively.

We also produced a calibration sequence in an attempt to match the simulator to our particular DAVIS 240C at default settings. For this, we moved a checkerboard across the image plane in ESIM, using various CTs. The scene was played on a high-refresh screen and recorded by our DAVIS. The resulting event-rate for each sequence, shown in Table 7, suggest a  $\text{CT} \approx 0.5$  to match the camera to the simulator. This is however in conflict with the  $\frac{\text{events}}{\text{pix}\cdot\text{s}}$  (8.2) of the real sequences compared to the  $\frac{\text{events}}{\text{pix}\cdot\text{s}}$  of the best training data CT (19.6). In other words, there seems to be a mismatch for this method of calibration, perhaps stemming from a difference in recording events from real scenes to recording scenes from a screen as was done for the checkerboard calibration sequence.

Table 7: Comparison of the  $\frac{\text{events}}{\text{pix}\cdot\text{s}}$  for simulated sequences at various CT settings with the  $\frac{\text{events}}{\text{pix}\cdot\text{s}}$  of a real calibration sequence. The sequence consists of a checkerboard in motion. The same sequence is also recorded by a real event camera (DAVIS 240C) using default bias settings. The result suggests that a CT value around 0.5 would be appropriate to match the simulator to the real camera.

| Contrast threshold                              | 0.2   | 0.5   | 0.75  | 1.0   | 1.5   | Real |
|-------------------------------------------------|-------|-------|-------|-------|-------|------|
| $\frac{\text{events}}{\text{pix}\cdot\text{s}}$ | 26.5  | 19.6  | 16.2  | 10.8  | 7.2   | 8.2  |
| LPIPS                                           | 0.289 | 0.285 | 0.289 | 0.311 | 0.316 | -    |

#### 6.4 Sequence Cuts

Since the frames accompanying the events in the commonly used MVSEC and IJRR datasets are of low quality, we only evaluate on select sequences and for select cuts of those sequences. These cuts are enumerated in Table 8.

Table 8: Start and end times for sequences in IJRR and MVSEC that we present validation statistics on. While both IJRR and MVSEC contain more sequences than the ones listed, those not included had very low quality accompanying frames (see Figure 3).

| IJRR          |           |         | MVSEC          |           |         |
|---------------|-----------|---------|----------------|-----------|---------|
| Sequence      | Start [s] | End [s] | Sequence       | Start [s] | End [s] |
| boxes_6dof    | 5.0       | 20.0    | indoor_flying1 | 10.0      | 70.0    |
| calibration   | 5.0       | 20.0    | indoor_flying2 | 10.0      | 70.0    |
| dynamic_6dof  | 5.0       | 20.0    | indoor_flying3 | 10.0      | 70.0    |
| office_zigzag | 5.0       | 12.0    | indoor_flying4 | 10.0      | 19.8    |
| poster_6dof   | 5.0       | 20.0    | outdoor_day1   | 0.0       | 60.0    |
| shapes_6dof   | 5.0       | 20.0    | outdoor_day2   | 100.0     | 160.0   |
| slider_depth  | 1.0       | 2.5     |                |           |         |

#### 6.5 MVSEC Expanded Results

For space reasons we did not include results of other works which quote MVSEC. This is because these works did not release the models, which meant we could not compare on the FWL metric, so we did not include them in the main paper. However, for completeness, we show the results of [39, 44] and [12]. As can be seen in Table 9, our network still compares very favorably. Interestingly, zero loss (doing nothing) is still the best overall at reducing outliers and is a strong

Table 9: Comparison of various methods to optic flow estimated from Lidar depth and ego-motion sensors [42]. The average-endpoint-error to the Lidar estimate (AEE) and the percentage of pixels with AEE above 3 and greater than 5 % of the magnitude of the flow vector (%Outlier) are presented for each method (lower is better, best in bold). The time between frames is  $dt=1$ . Zeros is the baseline error resulting from always estimating zero flow.

| Dataset      | outdoor_day1 |             | outdoor_day2 |             | indoor_flying1 |             | indoor_flying2 |             | indoor_flying3 |             |
|--------------|--------------|-------------|--------------|-------------|----------------|-------------|----------------|-------------|----------------|-------------|
|              | AEE          | %Outlier    | AEE          | %Outlier    | AEE            | %Outlier    | AEE            | %Outlier    | AEE            | %Outlier    |
| Zeros        | 4.31         | 0.39        | 1.07         | <b>0.91</b> | 1.10           | 1.00        | 1.74           | <b>0.89</b> | 1.50           | <b>0.94</b> |
| EVFlow [43]  | 0.49         | 0.20        | -            | -           | 1.03           | 2.20        | 1.72           | 15.10       | 1.53           | 11.90       |
| EVFlow+ [44] | <b>0.32</b>  | <b>0.00</b> | -            | -           | 0.58           | <b>0.00</b> | 1.02           | 4.00        | 0.87           | 3.00        |
| Gehrig [12]  | -            | -           | -            | -           | 0.96           | 0.91        | 1.38           | 8.20        | 1.40           | 6.47        |
| Ours         | 0.68         | 0.99        | <b>0.82</b>  | 0.96        | <b>0.56</b>    | 1.00        | <b>0.66</b>    | 1.00        | <b>0.59</b>    | 1.00        |
| ECN* [39]    | 0.35         | 0.04        | -            | -           | 0.21           | 0.01        | -              | -           | -              | -           |

\*ECN is trained on 80 % of the sequence and evaluated on the remaining 20 %. This prevents direct comparison, however we include their result for completeness sake.

contender for AEE (especially in the flying sequences), showing the importance of reporting the relative improvement as in our FWL.

## 6.6 Additional Qualitative Results

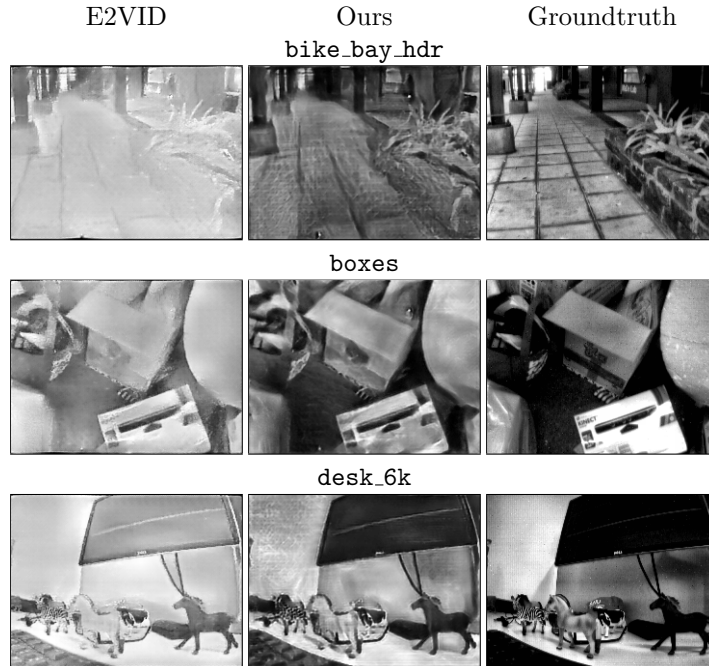



desk\_fast

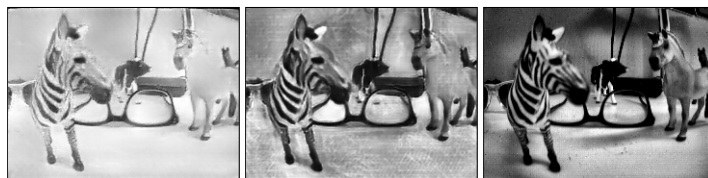

desk\_hand\_only

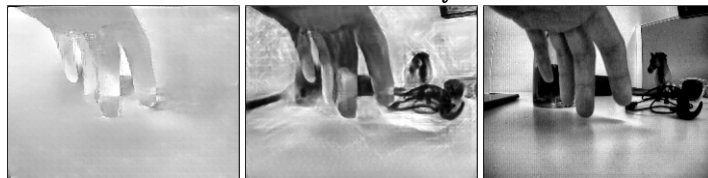

desk\_slow

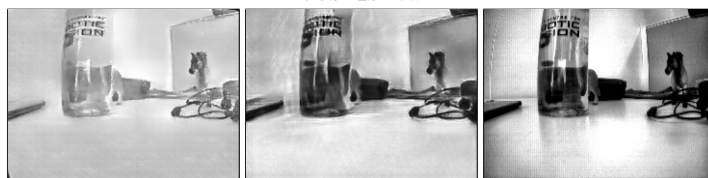

engineering\_posters

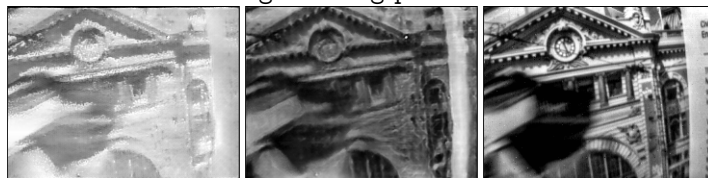

high\_texture\_plants

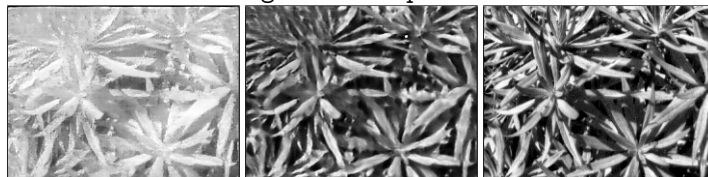

poster\_pillar\_1

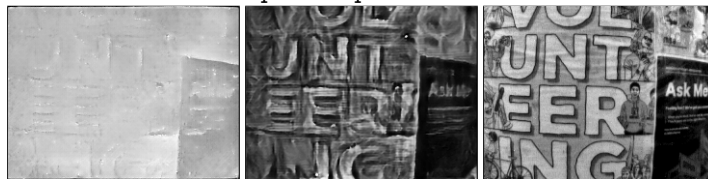

poster\_pillar\_2

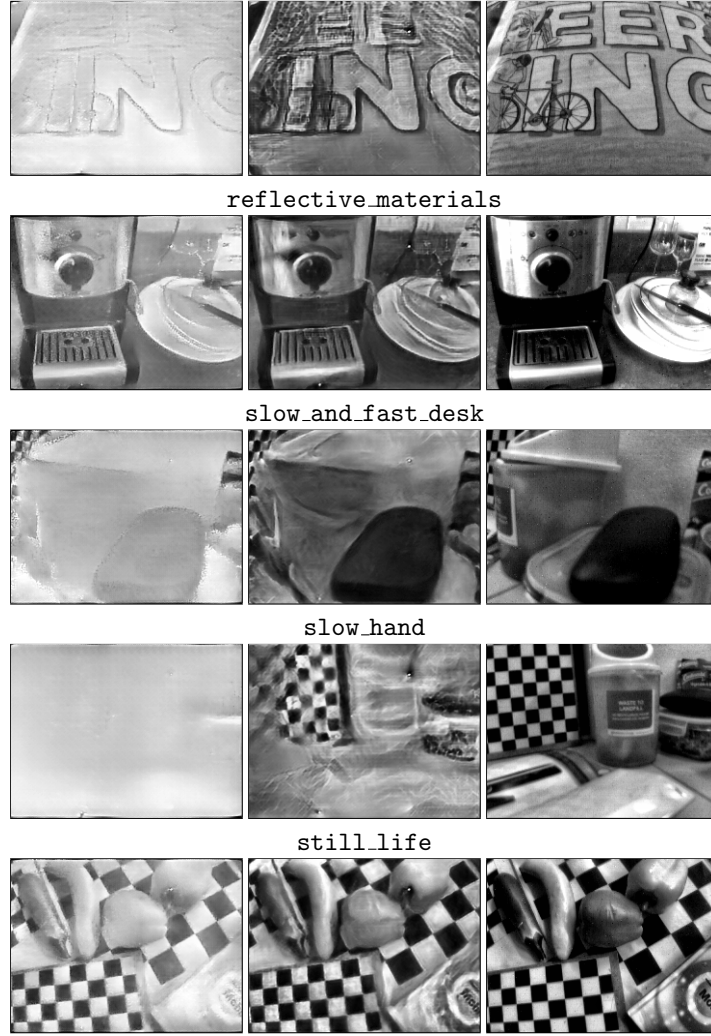

Table 10: Qualitative results for HQFD. Random selection, not cherry picked.

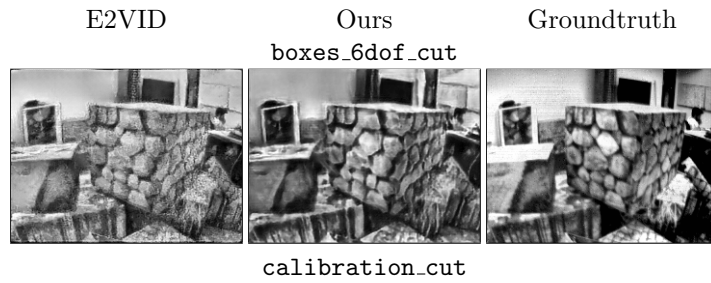

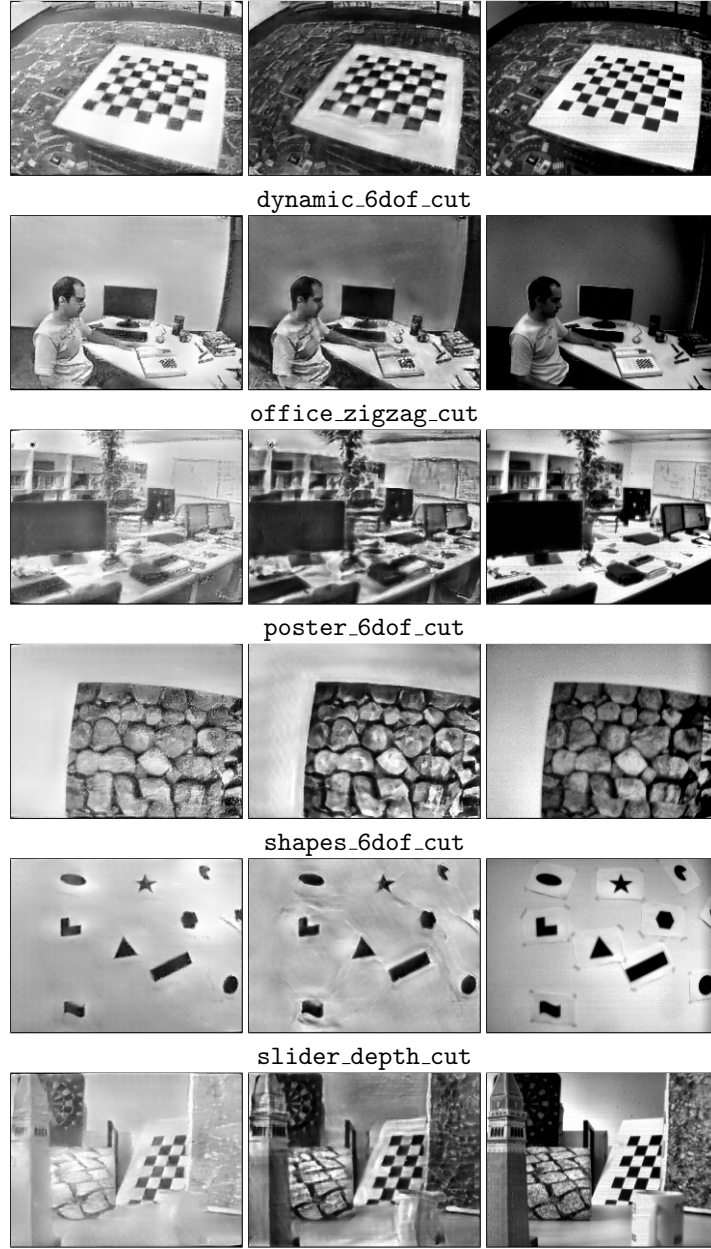

Table 11: Qualitative results for IJRR. Random selection, not cherry picked.

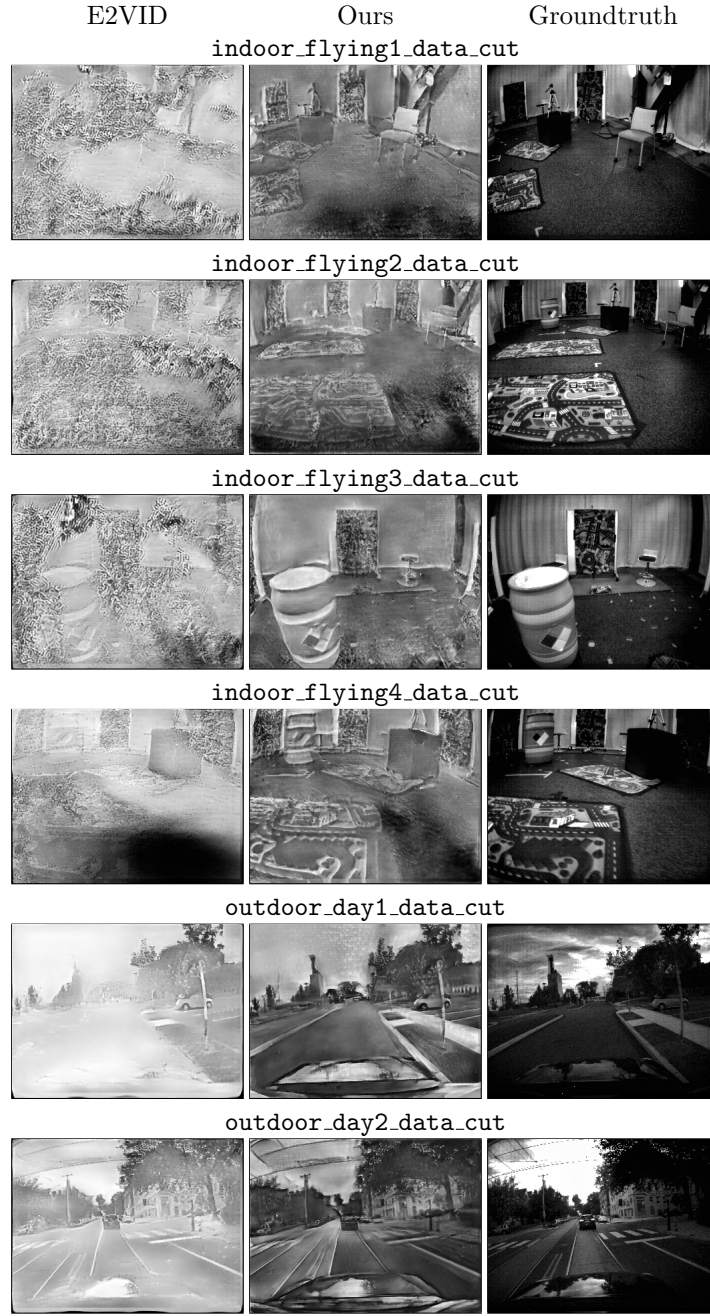

Table 12: Qualitative results for MVSEC. Random selection, not cherry picked.

E2VID

Ours

Groundtruth

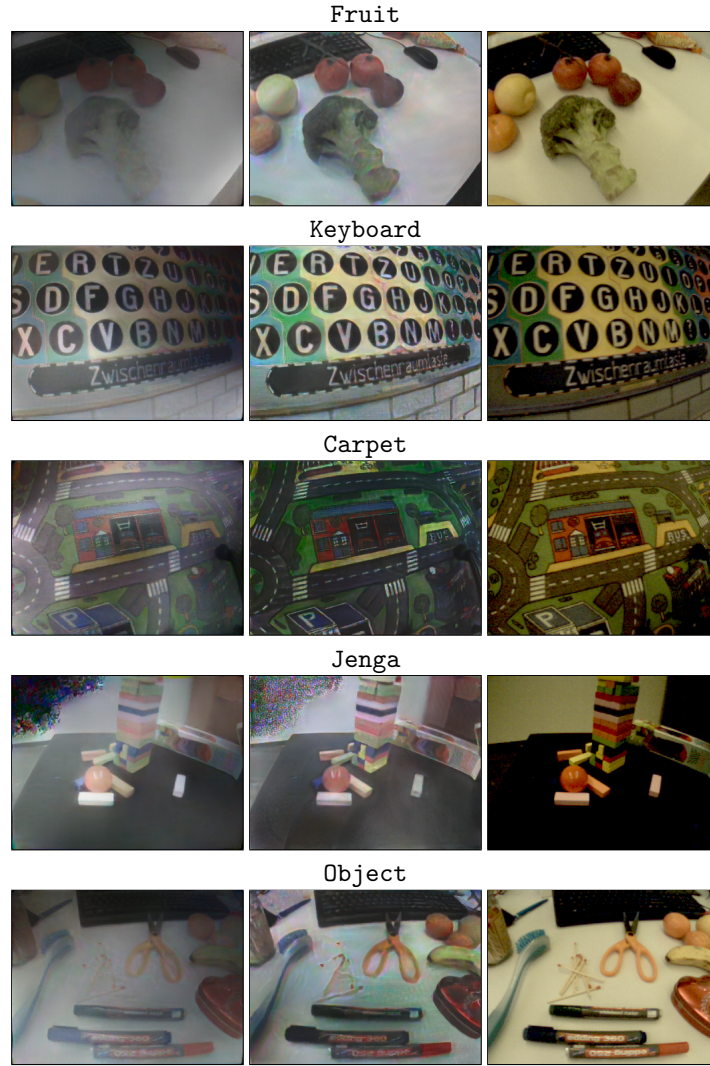

Table 13: Qualitative results for CED [33]. Random selection, not cherry picked. As a matter of interest, the Jenga sequence shows a region of the scene where there is only blank wall, so few events have been generated, resulting in the peculiar artifacts seen in the top left corner.

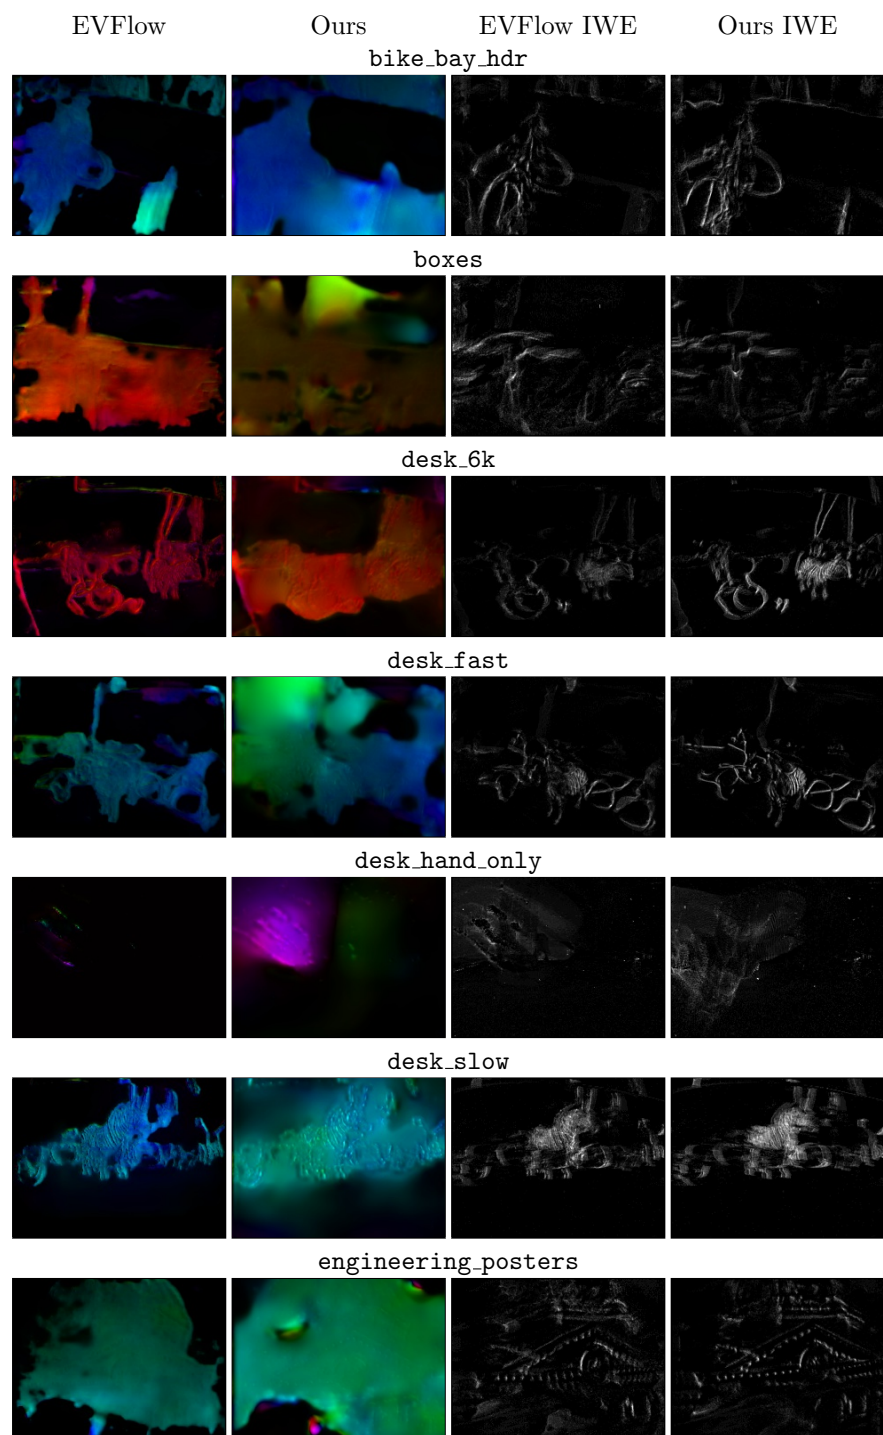



high\_texture\_plants

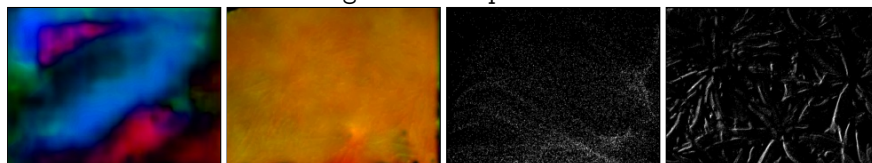

poster\_pillar\_1

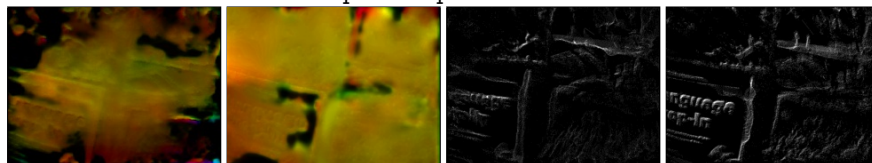

poster\_pillar\_2

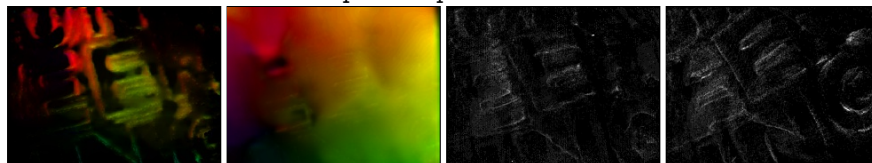

reflective\_materials

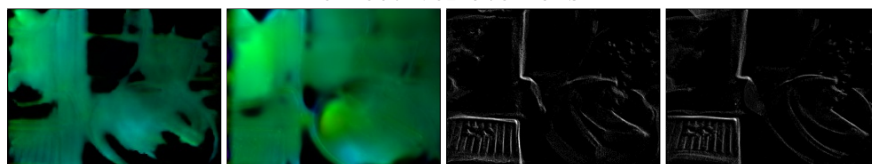

slow\_and\_fast\_desk

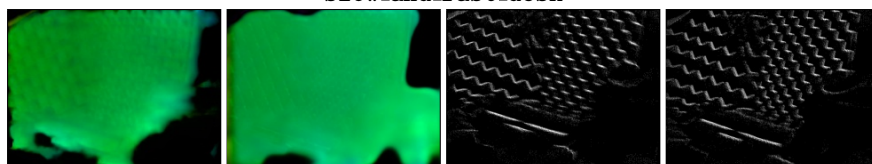

slow\_hand

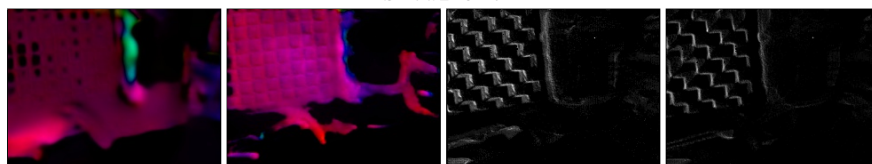

still\_life

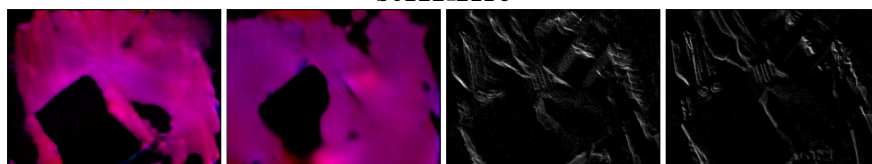

Table 14: Qualitative results for HQFD. Left: optic flow vectors represented in HSV color space, right: image of warped events (IWE). Random selection, not cherry picked.

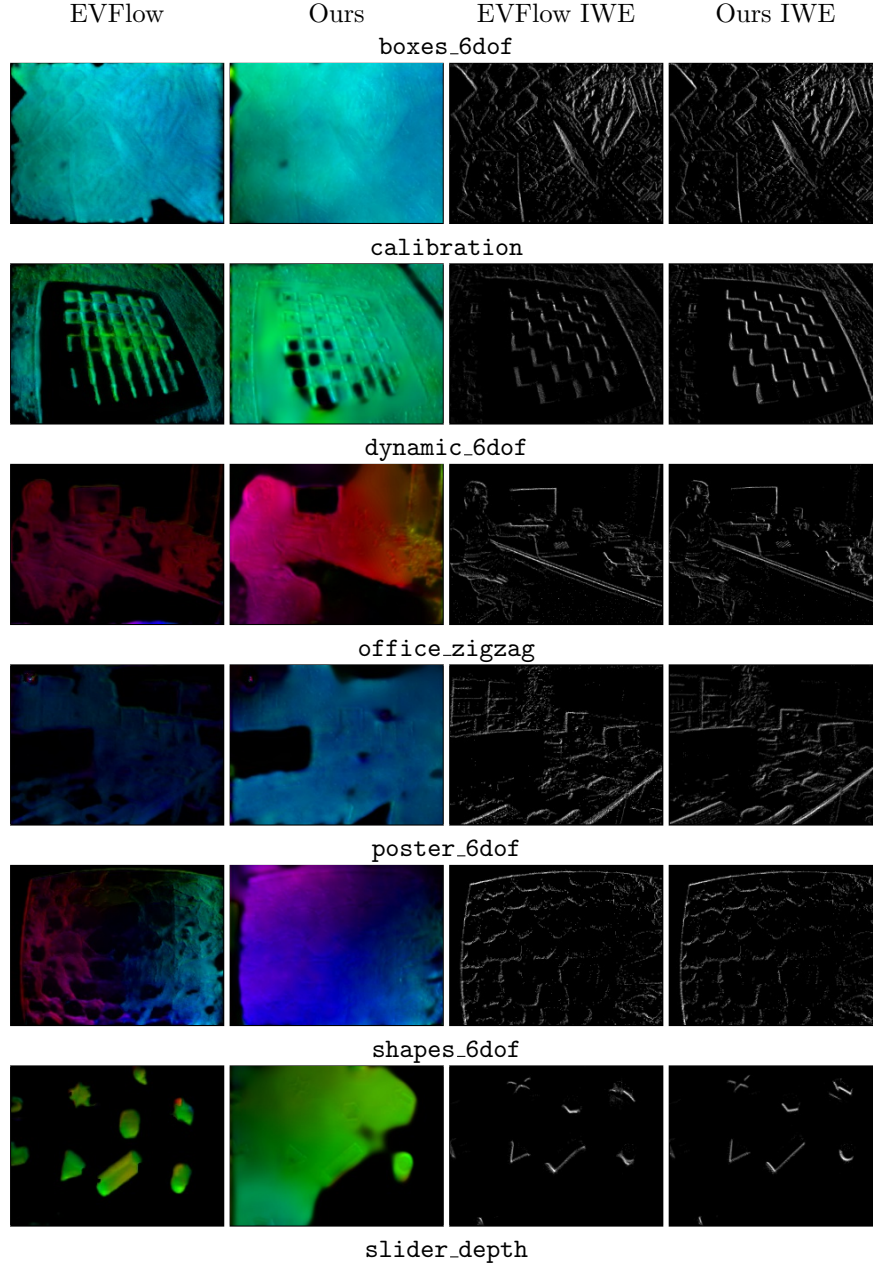



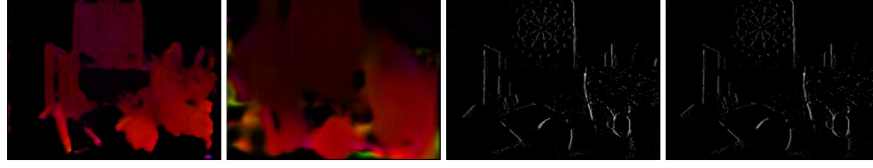

Table 15: Qualitative results for IJRR. Left: optic flow vectors represented in HSV color space, right: image of warped events (IWE). Random selection, not cherry picked.

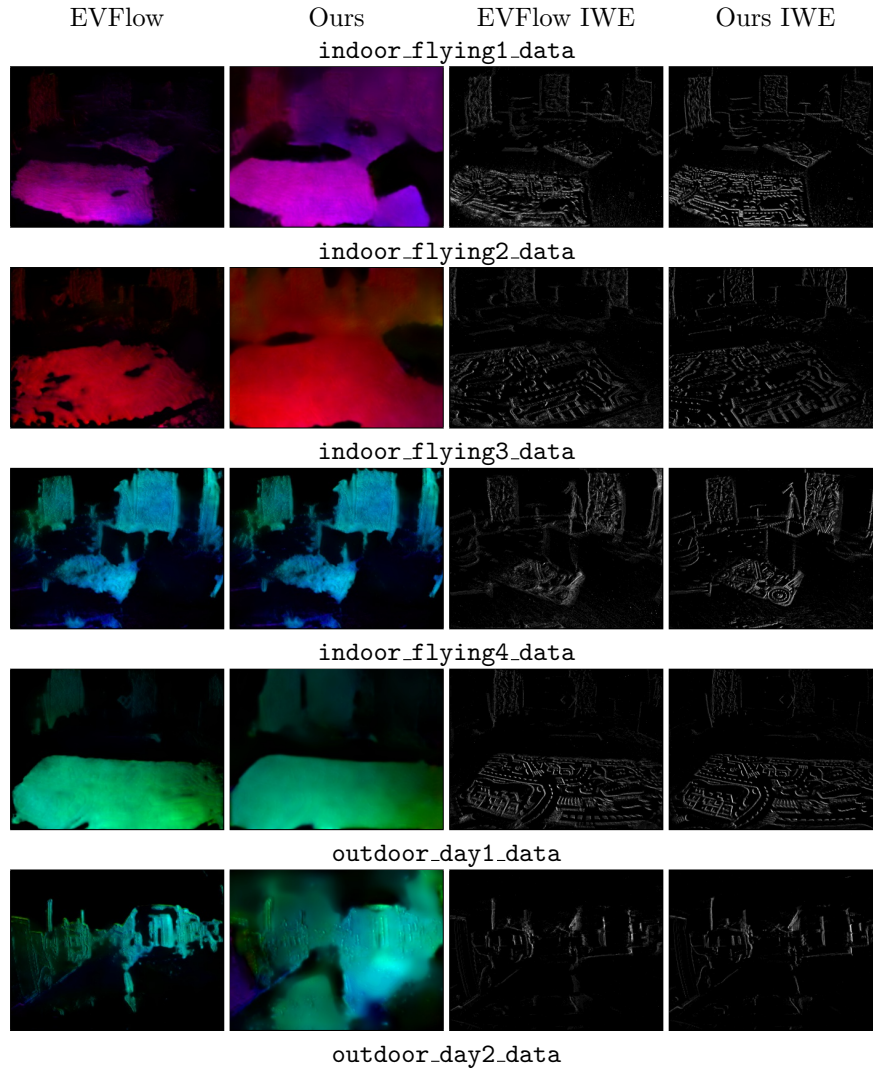

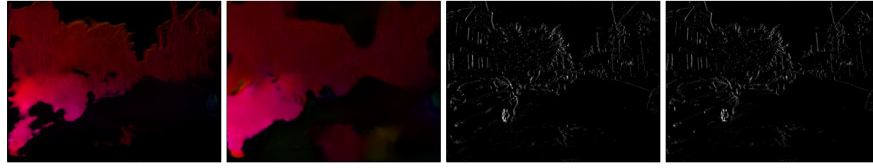

Table 16: Qualitative results for optic flow on MVSEC. Left: optic flow vectors represented in HSV color space, right: image of warped events (IWE). Random selection, not cherry picked.

### 6.7 FireNet

Scheerlinck *et al.* [32] propose a lightweight network architecture for fast image reconstruction with an event camera (FireNet) that has 99.6 % fewer parameters than E2VID [28] while achieving similar accuracy on IJRR [23]. We retrain FireNet using our method and evaluate the original (FireNet) vs. retrained (FireNet+) on IJRR, MVSEC and HQF (Table 17). FireNet+ performs better on HQF and MVSEC though worse on IJRR. One possible explanation is that the limited capacity of a smaller network limits generalizability over a wider distribution of data, and the original FireNet overfits to data similar to IJRR, namely low CTs. If our hypothesis is correct, it presents an additional disadvantage to small networks for event cameras. Comprehensive evaluation (HQF + IJRR + MVSEC) reveals bigger performance gap between FireNet (Table 17) and E2VID (Table 1) architectures than shown in [32] (IJRR only). Qualitatively (Figure 18), FireNet+ looks noisier in textureless regions, while FireNet produces lower contrast images.

Table 17: Mean MSE, SSIM [38] and LPIPS [41] on our HQF dataset, IJRR [23] and MVSEC [42], for original FireNet vs. retrained with our method (FireNet+).

| Model    | HQF          |              |              | IJRR         |              |              | MVSEC        |              |              |
|----------|--------------|--------------|--------------|--------------|--------------|--------------|--------------|--------------|--------------|
|          | MSE          | SSIM         | LPIPS        | MSE          | SSIM         | LPIPS        | MSE          | SSIM         | LPIPS        |
| FireNet  | 0.052        | <b>0.514</b> | 0.387        | <b>0.055</b> | <b>0.630</b> | <b>0.257</b> | 0.182        | <b>0.320</b> | 0.594        |
| FireNet+ | <b>0.049</b> | 0.477        | <b>0.349</b> | 0.058        | 0.503        | 0.327        | <b>0.157</b> | 0.288        | <b>0.551</b> |

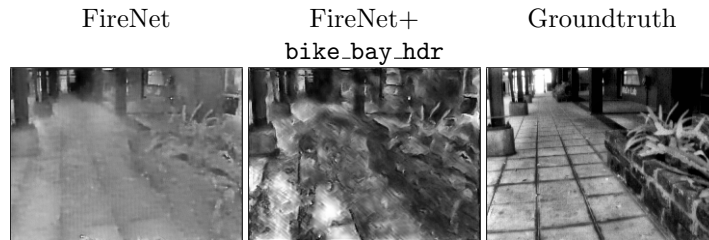

boxes

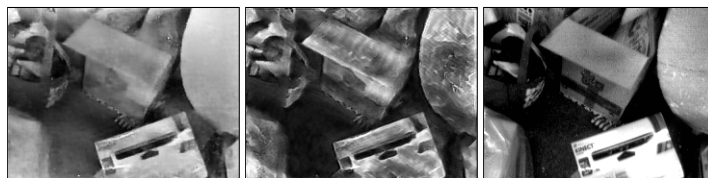

desk\_6k

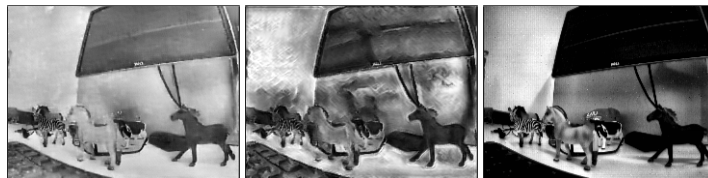

desk\_fast

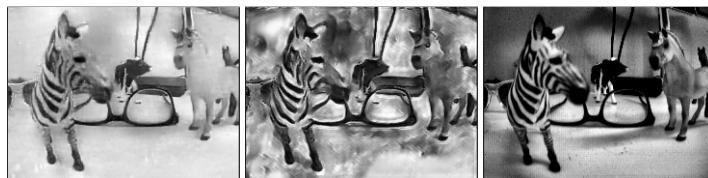

desk\_hand\_only

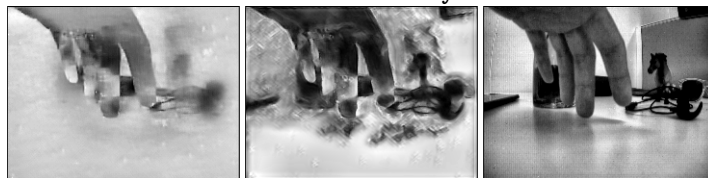

desk\_slow

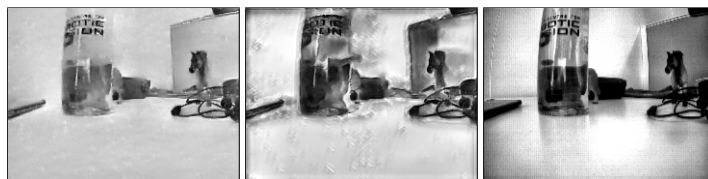

engineering\_posters

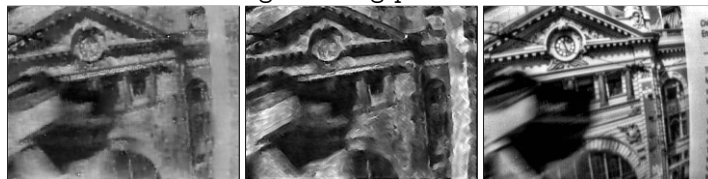

high.texture\_plants

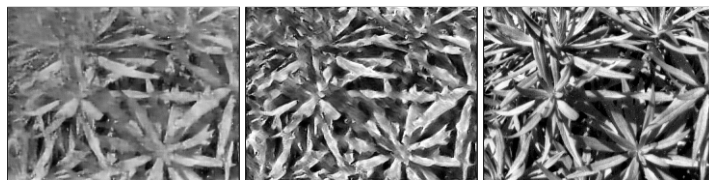

poster\_pillar\_1

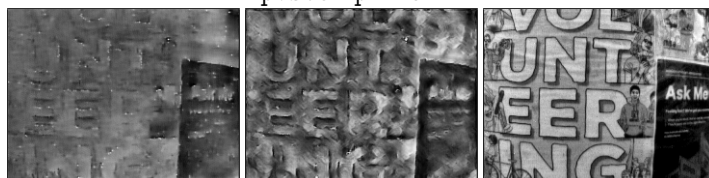

poster\_pillar\_2

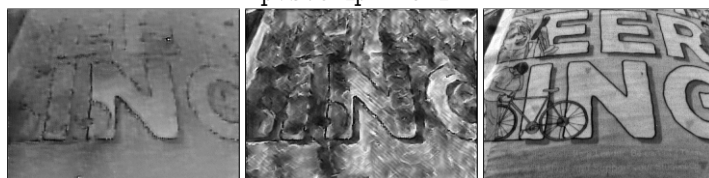

reflective\_materials

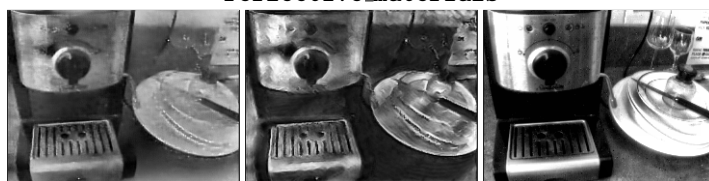

slow\_and\_fast\_desk

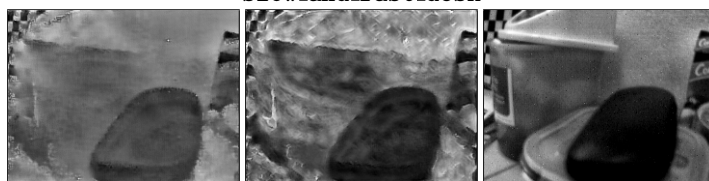

slow\_hand

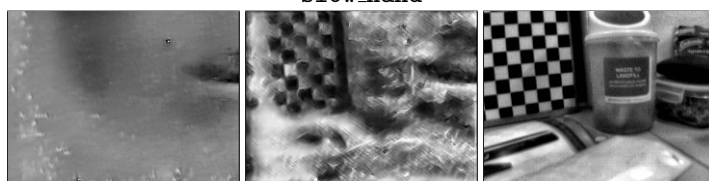

still\_life

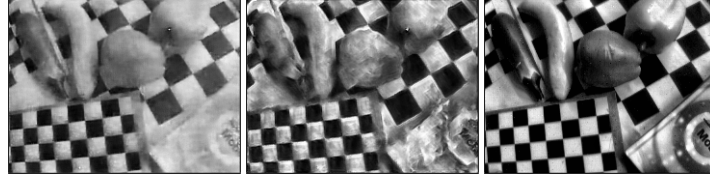

Table 18: Qualitative results for HQFD. Random selection, not cherry picked.

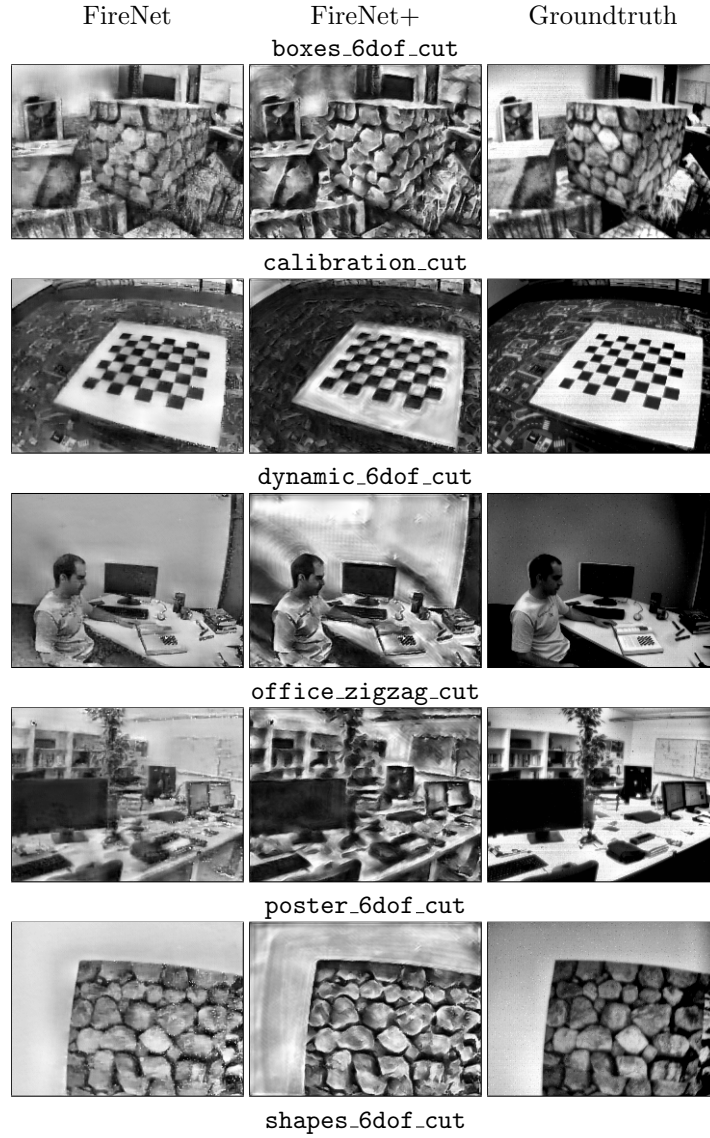

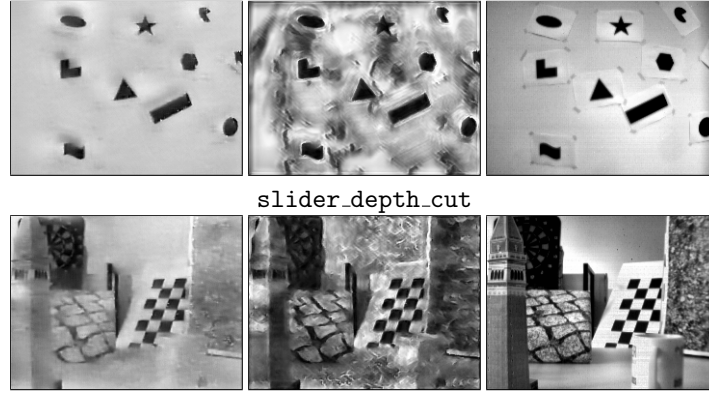

Table 19: Qualitative results for IJRR. Random selection, not cherry picked.

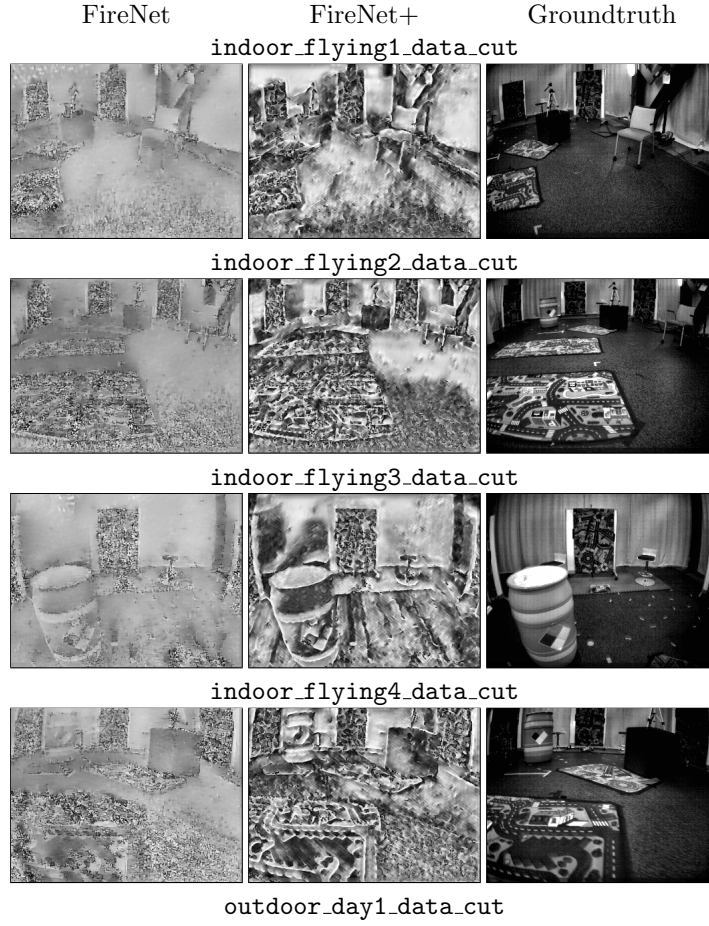

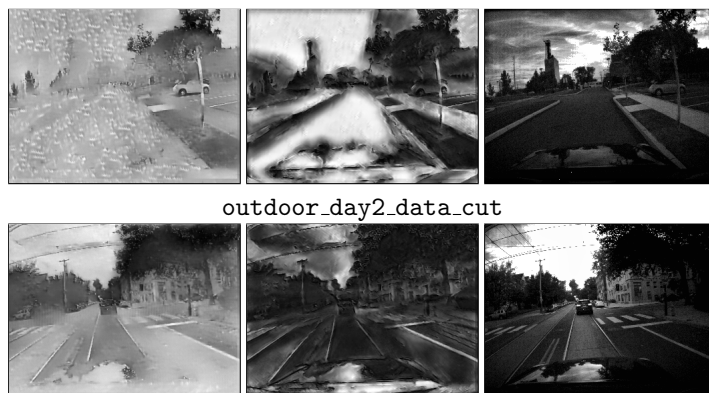

Table 20: Qualitative results for MVSEC. Random selection, not cherry picked.
