# Supplementary material
Source: ML conference proceedings conference paper supplement (https://www.ecva.net/papers/eccv_2020/papers_ECCV/html/123720528_ECCV_2020_paper.php)
Supplement: Supplementary file 2 [file 123720528-supp.zip]

Archive with 2 entries (2 files):
- 5855_supp.mp4
- 5855-supp.pdf
